# Supplementary material for: One-pot synthesized MoC imbedded in ordered mesoporous carbon as a catalyst for N2H4 decomposition
Source: Royal Society of Chemistry journal article supplement (doi:10.1039/b801057a), 2008-01-01
Supplement: b801057a.pdf [file b801057a.pdf]

## **SUPPLEMENTARY INFORMATION**

### **One-pot synthesized MoC imbedded in ordered mesoporous carbon as a catalyst for N<sub>2</sub>H<sub>4</sub> decomposition**

**Hui Wang, Aiqin Wang, Xiaodong Wang and Tao Zhang\***

State Key Laboratory of Catalysis, Dalian Institute of Chemical Physics,  
Chinese Academy of Sciences, Dalian, China

E-mail: [taozhang@dicp.ac.cn](mailto:taozhang@dicp.ac.cn)

**Table S1** Physical properties of the three samples.

| Sample                | Mo content <sup>a</sup><br>(Wt %) | $S_{\text{BET}}$ <sup>b</sup><br>(m <sup>2</sup> /g) | $V_{\text{M}}$ <sup>c</sup><br>(cm <sup>3</sup> /g) | $V_{\text{T}}$ <sup>d</sup><br>(cm <sup>3</sup> /g) | $D_{\text{p}}$ <sup>e</sup><br>(nm) |
|-----------------------|-----------------------------------|------------------------------------------------------|-----------------------------------------------------|-----------------------------------------------------|-------------------------------------|
| OMC                   | 0                                 | 758                                                  | 0.15                                                | 0.86                                                | 5.5                                 |
| MoC-OMC               | 4.0                               | 700                                                  | 0.14                                                | 0.86                                                | 6.5                                 |
| Mo <sub>2</sub> C/OMC | 3.9                               | 707                                                  | 0.15                                                | 0.78                                                | 5.6                                 |

<sup>a</sup> Mo content was determined by ICP. <sup>b</sup> Brunauer-Emmet-Teller (BET) surface area. <sup>c</sup> Micropore volume determined by t-plot. <sup>d</sup> Total pore volume calculated as the amount of nitrogen adsorbed at a relative pressure of 0.99. <sup>e</sup> pore diameter calculated by the Barrett-Joyner-Halenda (BJH) method using desorption branches.

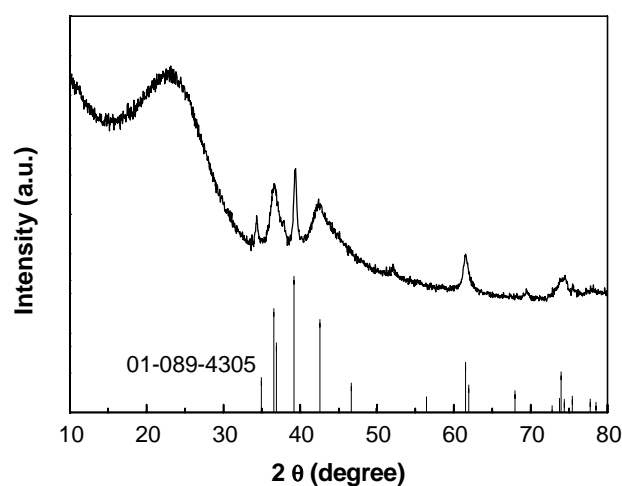

**Fig.S1**

Fig. S1 XRD pattern of the MoC-OMC obtained by adding 0.4 g (NH<sub>4</sub>)<sub>6</sub>Mo<sub>7</sub>O<sub>24</sub>·4H<sub>2</sub>O to the reaction system.

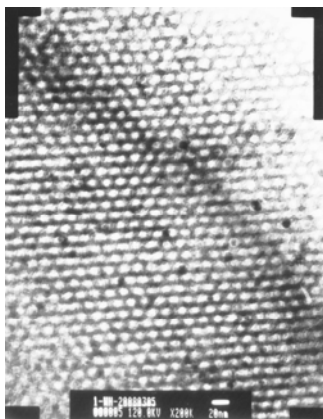

**Fig.S2**

Fig. S2 TEM image of the MoC-OMC viewed along [001] orientation

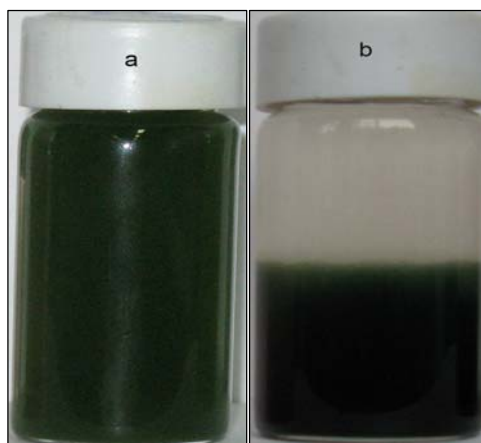

**Fig.S3**

Fig. S3 photographs of the reaction system (a) at the beginning of the polymerization;  
(b) after standing at RT for 24 h.
